# Supplementary material for: Joint QTL Linkage Mapping for Multiple-Cross Mating Design Sharing One Common Parent
Source: PLoS One. 2011 Mar 15;6(3):e17573. doi: 10.1371/journal.pone.0017573 (PMC3057965; doi:10.1371/journal.pone.0017573)
Supplement: Table S1 — Fifty-two identified QTL for maize NAM population by JICIM. (XLS) [file pone.0017573.s004.xls]

## Sheet: Table S1
Table S1
QTLID	Ch	Pos (cM)	LOD	Additive effect																										Phenotypic variance explained (PVE; %)
				B97	CML103	CML228	CML247	CML277	CML322	CML333	CML52	CML69	Hp301	II14H	Ki11	Ki3	Ky21	M162W	M37W	Mo18W	MS71	NC350	NC358	Oh43	Oh7B	P39	Tx303	Tzi8		B97	CML103	CML228	CML247	CML277	CML322	CML333	CML52	CML69	Hp301	II14H	Ki11	Ki3	Ky21	M162W	M37W	Mo18W	MS71	NC350	NC358
Q50	10	42	56.1338	0.16835	-0.25535	1.28135	0.21105	1.65995	-0.28415	-0.2209	-0.13155	0.07635	0.01285	0.09905	1.5522	-0.10465	0.22275	-0.0515	-0.06455	-0.03345	-0.00025	0.07415	0.0101	-0.26575	0.35535	-0.16585	-0.1286	0.05485		1.08668	3.1385	20.9074	0.539138	28.0503	1.79978	1.22083	0.224622	0.189288	0.00350011	0.181453	26.2679	0.203118	1.44711	0.0585232	0.106185	0.0134198	2.38457e-06	0.126211	0.00329667
Q5	1	84	52.7124	0.55595	0.04315	0.4906	0.402	0.4274	0.56275	0.52	0.5469	-0.00225	0.3443	-0.4258	0.4292	0.14415	0.51655	0.4204	0.3161	0.2086	0.4492	0.40305	0.2678	0.2183	0.6171	0.09825	0.49945	0.4408		11.8508	0.0896213	3.06493	1.95606	1.85958	7.05918	6.76504	3.88228	0.000164388	2.51275	3.35325	2.0084	0.385389	7.78198	3.89977	2.54635	0.521895	7.69856	3.72899	2.31769
Q19	2	126	44.9307	-0.0172	-0.1846	0.0117	0.5494	0.1976	0.44415	-0.1154	0.62115	0.5253	0.36705	0.3206	0.2435	0.80075	0.2511	0.00735	0.4423	0.3543	0.41725	0.43405	0.49605	0.339	0.38885	-0.0103	0.47835	0.47815		0.0113431	1.64026	0.00174316	3.65348	0.397485	4.39727	0.333177	5.008	8.96023	2.85579	1.901	0.64644	11.8922	1.8389	0.00119203	4.98544	1.50555	6.64236	4.32467	7.95214
Q48	9	63	42.8018	0.16395	0.16815	0.45075	0.4812	0.39535	0.63675	0.5672	0.54575	0.29115	0.3712	0.1122	0.6095	0.66935	0.4229	0.038	0.05725	0.70995	0.315	0.0962	0.3439	0.00495	0.34075	0.062	0.2679	0.28625		1.03062	1.36095	2.58724	2.80272	1.59115	9.03777	8.04889	3.86597	2.75257	2.92073	0.232831	4.05021	8.30953	5.21604	0.0318626	0.0835258	6.04519	3.78574	0.212434	3.82206
Q42	8	65	32.1226	0.13435	-0.01495	0.3227	0.12955	-0.2551	0.04655	0.3437	0.3431	-0.30845	-0.2609	-1.13395	0.0218	0.29095	0.17375	0.06025	-0.03555	0.39435	-0.59495	-0.27975	-0.0248	-0.1437	0.0798	-0.17695	0.14805	-0.4633		0.69207	0.010758	1.32606	0.203144	0.662473	0.0483018	2.95544	1.52796	3.0894	1.44286	23.7817	0.00518136	1.57003	0.880471	0.0800991	0.0322069	1.86517	13.5049	1.79645	0.0198763
Q47	9	55	26.3896	-0.2495	0.0006	0.8276	0.1798	0.0318	0.31005	0.36575	0.36315	-0.07635	-0.10165	-0.13765	0.99975	0.3522	0.0259	-0.10845	-0.37	0.3911	0.0828	-0.13685	0.0431	-0.19305	-0.02975	-0.2318	-0.031	-0.0459		2.3868	1.73282e-05	8.72179	0.391299	0.0102944	2.14283	3.34682	1.71176	0.189288	0.219023	0.350435	10.8972	2.30064	0.0195643	0.259521	3.48878	1.83455	0.261572	0.429896	0.0600327
Q25	3	118	26.0608	0.0835	0.18955	0.2825	0.6415	0.4768	0.2795	0.2004	0.15685	0.09845	0.41585	0.347	0.0087	0.65875	0.1465	0.2914	0.03375	0.55295	0.0756	0.5401	0.13525	0.2322	0.13585	0.1768	0.1318	0.0263		0.26733	1.72941	1.01625	4.98107	2.3143	1.74135	1.00475	0.31933	0.314728	3.66564	2.22697	0.000825219	8.04843	0.625951	1.87367	0.029028	3.66713	0.218059	6.6961	0.591164
Q12	2	39	24.646	-0.2623	-0.12585	0.08665	-0.20965	0.02795	-0.24715	-0.3239	-0.3091	-0.22305	-0.531	0.03625	-0.3506	-0.4923	-0.4392	0.20885	-0.05785	-0.35615	-0.2581	-0.0757	0.0357	-0.64425	-0.114	-0.1063	-0.3539	0.08225		2.63798	0.762353	0.0956097	0.532009	0.00795263	1.36158	2.62473	1.24014	1.61551	5.97675	0.0243036	1.34015	4.495	5.62587	0.962459	0.0852858	1.52132	2.54159	0.131542	0.0411879
Q43	8	69	22.1121	0.24835	0.17265	0.38765	0.30525	-0.08355	0.22015	0.40935	0.54655	-0.12545	-0.0067	0.10865	0.2526	0.46505	0.33505	0.27735	0.1459	0.4676	0.1224	-0.09215	0.3323	0.06815	0.1954	-0.08485	0.4055	-0.15235		2.36485	1.43477	1.91357	1.12782	0.0710624	1.08034	4.19231	3.87731	0.511029	0.000951536	0.218331	0.69566	4.01115	3.27404	1.69734	0.542476	2.62243	0.571601	0.194924	3.56857
Q16	2	74	21.9653	0.22255	0.0177	0.2546	0.04105	-0.14785	0.15705	0.0116	0.5038	0.1726	0.01375	0.20305	0.11295	0.04345	0.1402	0.795	0.5647	-0.10685	0.1668	0.2334	0.3227	-0.1199	0.297	0.045	0.1337	0.13425		1.89902	0.0150798	0.825433	0.0203965	0.222531	0.549793	0.00336651	3.29448	0.967355	0.00400757	0.762537	0.139092	0.0350146	0.573273	13.9459	8.12654	0.136931	1.0615	1.25048	3.36536
Q49	9	67	21.9426	-0.17585	-0.146	0.0712	0.16315	0.15865	0.25605	0.25085	0.0573	0.06625	0.06375	-0.24915	0.1691	0.2337	0.01955	-0.18525	-0.2467	0.4724	-0.7173	-0.0808	0.0341	-0.3546	-0.0319	-0.2735	-0.34115	0.04775		1.18566	1.02602	0.0645542	0.322183	0.256228	1.46141	1.57432	0.0426167	0.14252	0.0861462	1.14809	0.311758	1.01295	0.011147	0.757234	1.55099	2.67654	19.6305	0.149864	0.0375787
Q3	1	58	19.5671	0.0735	-0.311	-0.1034	-0.3009	0.0587	0.08395	0.21145	0.15985	-0.5155	0.0659	0.06195	-0.2349	0.24335	0.1909	0.1453	0.392	0.72825	0.0888	-0.0055	-0.0146	-0.2238	0.2765	-0.08575	0.1619	-0.10105		0.207133	4.65555	0.136146	1.09591	0.0350771	0.157096	1.11861	0.331662	8.62902	0.0920548	0.0709803	0.601584	1.09833	1.06286	0.465849	3.91599	6.36085	0.300854	0.000694383	0.00688873
Q4	1	66	19.4346	0.16945	-0.30775	0.1014	-0.01675	0.312	0.2928	0.22045	0.41885	-0.2433	0.27605	0.1035	-0.1412	0.25805	0.22225	0.27235	0.4657	0.03255	0.2527	0.35425	0.02225	0.0227	0.36525	0.01545	0.1433	0.07555		1.10093	4.55875	0.13093	0.00339593	0.99096	1.91102	1.21586	2.27713	1.92216	1.61529	0.198123	0.21737	1.23503	1.44062	1.6367	5.52691	0.0127074	2.43635	2.88067	0.015999
Q15	2	71	19.0356	-0.0012	-0.26235	-0.2145	0.75925	-0.3824	0.04975	-0.1819	0.3422	-0.0161	-0.0067	0.0143	-0.01595	-0.1371	0.0577	0.60825	0.3923	-0.30145	0.0349	0.01675	0.19355	-0.31725	0.06995	-0.11485	-0.05565	-0.0858		5.52125e-05	3.31293	0.585894	6.97748	1.48862	0.0551709	0.827807	1.51996	0.00841698	0.000951536	0.00378205	0.00277365	0.348614	0.0970995	8.16352	3.92199	1.0899	0.0464709	0.00644026	1.21065
Q37	6	73	19.0295	0.14875	0.24615	-0.1694	0.3056	-0.03865	0.29505	0.06725	0.2501	0.16485	-0.41775	-0.0096	-0.0514	-0.39325	-0.00225	0.2106	0.0498	0.1629	0.1235	0.76575	-0.0473	-0.09325	0.2667	-0.25115	0.11455	0.11745		0.848377	2.91642	0.365419	1.13041	0.0152071	1.9405	0.113148	0.811892	0.882434	3.69921	0.0017045	0.0288043	2.86819	0.000147649	0.978656	0.0632017	0.31827	0.581921	13.4601	0.0723029
Q1	1	35	18.9622	0.1371	-0.1453	0.14285	-0.13405	-0.1121	0.03365	0.1592	0.10005	-0.53425	0.08995	0.43595	-0.00055	0.1167	0.46385	0.30085	0.3695	0.0098	0.18775	0.0183	-0.06795	-0.23565	0.076	-0.04945	0.5201	-0.1602		0.720692	1.0162	0.259852	0.217502	0.127926	0.0252402	0.634088	0.129929	9.26816	0.171506	3.51502	3.29804e-06	0.252587	6.2751	1.99716	3.47936	0.00115188	1.3449	0.00768734	0.149215
Q39	7	75	18.9426	0.2398	-0.1458	0.09485	0.6296	-0.3271	0.0322	-0.2067	-0.25445	0.2509	-0.60445	-0.2551	0.28235	-0.21695	0.17325	0.03565	-0.0078	-0.26205	0.14645	-0.11845	-0.2575	-0.2485	0.0141	0.05005	0.29355	0.1035		2.20482	1.02321	0.114562	4.79798	1.0892	0.0231119	1.06892	0.84038	2.04412	7.74456	1.20358	0.869173	0.87295	0.875411	0.0280435	0.00155045	0.823612	0.818293	0.322065	2.14283
Q40	7	82	18.771	0.01855	-0.28795	-0.1303	-0.05175	-0.32685	-0.2187	-0.28585	-0.19885	-0.10125	-0.2599	-0.5444	0.12705	-0.49935	0.0257	-0.1406	-0.08935	-0.4121	-0.11245	-0.18025	-0.41695	-0.5218	-0.2256	-0.17785	-0.0317	0.0485		0.0131936	3.99102	0.216199	0.0324153	1.08754	1.06616	2.04428	0.513242	0.332885	1.43182	5.4814	0.175987	4.62466	0.0192633	0.436198	0.203451	2.03685	0.482446	0.745803	5.61825
Q23	3	67	18.6667	-0.1701	-0.1877	0.31275	0.17955	0.19455	-0.3354	0.2454	0.1921	0.00575	0.191	-0.54255	0.27995	-0.0579	-0.268	-0.0075	-0.07835	-0.0981	-0.2783	0.05535	0.1396	0.2062	-0.4106	-0.0503	-0.4669	-0.04485		1.10939	1.69581	1.24555	0.390211	0.385309	2.50755	1.50665	0.478989	0.00107359	0.77329	5.44421	0.85446	0.0621766	2.09476	0.00124118	0.15644	0.115423	2.95499	0.0703249	0.629802
Q41	8	57	18.5669	0.065	-0.04705	0.1079	0.0982	-0.2517	-0.18705	0.1241	0.02375	-0.2652	-0.2166	0.07925	-0.05745	0.13685	0.0096	0.0439	-0.0436	0.3647	-0.04595	-0.4344	-0.1269	-0.07245	0.0275	-1.0622	0.22645	-0.37035		0.161995	0.106554	0.148254	0.116722	0.644931	0.7799	0.385307	0.00732147	2.28376	0.994472	0.116159	0.0359841	0.347344	0.00268787	0.0425248	0.0484443	1.59524	0.0805566	4.33165	0.520423
Q32	5	9	18.418	0.03685	0.10315	-0.29225	-0.49215	-0.0419	-0.14755	-0.27135	-0.23605	0.02055	-0.2064	-0.2979	-0.27905	0.17085	-0.49675	-0.06745	-0.15185	-0.2679	-0.0581	-0.43375	0.0007	0.02245	-0.15005	-0.30565	-0.25775	-0.2766		0.0520655	0.51214	1.08761	2.93173	0.0178721	0.485291	1.84214	0.723234	0.0137129	0.903016	1.64133	0.848974	0.541377	7.19683	0.100387	0.587624	0.860795	0.12879	4.3187	1.58354e-05
Q17	2	91	18.3855	-0.17775	-0.2389	-0.0536	0.0316	-0.33545	0.29285	-0.00645	0.1549	-0.0943	-0.33215	-0.26365	0.0535	0.2092	0.04095	0.54125	0.44725	-0.3301	-0.0012	0.27625	0.17165	-0.37905	0.11785	-0.05545	-0.27265	0.17265		1.21142	2.74715	0.0365843	0.0120866	1.14552	1.91167	0.00104084	0.31144	0.288754	2.33854	1.28561	0.031206	0.811696	0.0489072	6.46412	5.09766	1.30691	5.49405e-05	1.75178	0.952184
Q2	1	41	18.1633	0.16905	-0.23095	-0.01935	-0.2012	-0.0162	0.0683	0.16005	0.2433	-0.39855	0.1301	0.12315	0.00465	0.19355	0.45	0.26245	0.37415	-0.1737	0.31215	0.0559	0.00505	-0.41175	0.10535	-0.0379	0.40705	-0.14085		1.09573	2.56735	0.0047679	0.489988	0.00267163	0.103984	0.640877	0.768343	5.15786	0.358782	0.280494	0.000235742	0.694794	5.90596	1.51987	3.56748	0.361871	3.71755	0.0717294	0.000824169
Q9	1	178	17.6292	-0.39285	-0.1137	-0.2953	-0.0011	0.5837	-0.01905	0.2621	0.4062	0.40745	-0.14625	-0.212	-0.10115	0.3894	0.2012	0.0979	-0.16965	-0.12455	-0.06695	-0.05025	-0.0457	0.1171	-0.15185	-0.3033	0.14925	0.13405		5.91737	0.622258	1.11043	1.46458e-05	3.46838	0.00808935	1.71869	2.14166	5.3908	0.453385	0.831241	0.111548	2.8123	1.18065	0.211485	0.733462	0.186055	0.171014	0.0579623	0.0674941
Q13	2	57	17.5754	0.0556	0.0152	0.0147	0.04435	-0.04655	-0.1758	-0.24085	0.1405	0.00685	-0.3606	0.53325	-0.1556	-0.07635	-0.114	0.4987	0.29575	-0.39005	-0.006	0.1826	0.39395	-0.30425	0.07525	-0.24165	-0.0793	0.2428		0.118529	0.0111208	0.00275169	0.0238076	0.022059	0.688908	1.4513	0.256226	0.00152365	2.75631	5.25916	0.263967	0.108116	0.379031	5.48772	2.22905	1.82471	0.00137351	0.765377	5.01551
Q38	7	46	17.3757	-0.00425	0.0811	0.03595	0.0551	-0.02365	0.18395	-0.0609	-0.3239	0.1333	0.069	-0.2269	-0.18045	0.0455	-0.0406	-0.0138	0.1706	-0.02245	0.1122	-0.2302	-0.47885	0.29005	0.33275	-0.04835	-0.11775	-0.8132		0.000692553	0.316586	0.0164575	0.0367479	0.00569389	0.754264	0.0927893	1.36174	0.576985	0.100919	0.952191	0.355013	0.0383966	0.0480748	0.00420215	0.741699	0.00604487	0.480303	1.21642	7.41024
Q10	1	181	17.1257	-0.3511	-0.1335	-0.20255	-0.10005	0.60375	-0.02245	0.29175	0.3678	-0.09425	-0.14255	-0.24395	-0.12305	-0.63165	0.2216	0.1039	-0.25505	-0.0756	-0.03795	-0.1286	-0.0817	0.10615	-0.24025	-0.3094	0.1886	0.036		4.72647	0.857852	0.522431	0.121161	3.71075	0.0112346	2.12954	1.75588	0.288448	0.430735	1.10067	0.16508	7.39985	1.4322	0.238202	1.65776	0.0685485	0.0549482	0.379626	0.215714
Q29	4	85	17.0652	0.0165	0.23385	-0.38875	0.13515	-0.1875	0.1233	-0.17265	0.28565	0.00335	-0.2879	0.2149	-0.3075	0.6381	-0.2844	-0.13615	0.0075	-0.00425	0.16705	0.2272	-0.0979	0.06715	-0.2671	-0.13	-0.31115	-0.41595		0.0104386	2.63223	1.92445	0.221086	0.35789	0.338883	0.745756	1.05911	0.000364413	1.75695	0.854138	1.03091	7.55175	2.35898	0.409024	0.00143348	0.000216637	1.06469	1.18492	0.309741
Q28	4	78	16.9651	-0.06825	0.07855	-0.38495	0.1222	-0.20575	-0.1268	-0.202	0.357	0.02175	-0.39075	0.1703	-0.23565	0.39205	-0.2983	-0.30465	0.03135	-0.07515	0.1606	0.1685	-0.20305	-0.14795	-0.32045	-0.1429	-0.1755	-0.4805		0.178599	0.29699	1.88701	0.180747	0.43095	0.358395	1.02086	1.65427	0.0153611	3.23649	0.536394	0.605432	2.85071	2.59521	2.04793	0.0250464	0.0677348	0.984059	0.651739	1.33241
Q14	2	62	16.8574	0.0827	-0.12205	0.0415	0.00835	-0.10975	-0.2082	-0.303	0.205	-0.0255	-0.14325	0.0312	-0.3659	-0.2256	-0.1185	0.5858	0.36335	-0.3562	0.0761	0.15925	0.30175	-0.3125	0.1375	-0.3829	0.0163	0.0815		0.262232	0.71701	0.0219311	0.000843921	0.122619	0.96624	2.29694	0.54548	0.0211147	0.434976	0.0180038	1.45967	0.943948	0.409545	7.57203	3.3645	1.52175	0.220953	0.582147	2.94258
Q8	1	133	16.8083	-0.5686	-0.0585	0.24895	-0.13465	0.1388	0.28645	0.3337	-0.187	-0.2338	0.1943	-0.2051	0.0856	0.0506	-0.0379	-0.12725	-0.20975	-0.08205	-0.0158	0.01645	0.18605	0.21855	0.1046	-0.44285	-0.25725	0.3031		12.3962	0.164726	0.789204	0.219453	0.196122	1.82903	2.78597	0.453894	1.77498	0.800242	0.778012	0.0798874	0.0474866	0.0418932	0.357297	1.12118	0.0807442	0.00952454	0.00621163	1.11865
Q22	3	59	16.8027	-0.1022	-0.1325	0.40675	0.1808	0.1191	0.02925	0.3626	-0.04585	0.11005	0.2485	-0.111	0.5773	0.10795	-0.1444	0.0593	0.0307	-0.2566	-0.28315	0.24	0.1163	0.339	-0.28635	0.007	-0.4781	-0.0513		0.400476	0.845048	2.10678	0.395663	0.144401	0.0190711	3.28942	0.0272866	0.393264	1.30897	0.227877	3.63357	0.21613	0.608135	0.0775931	0.0240185	0.78971	3.05888	1.3222	0.437112
Q24	3	85	16.491	-0.1849	-0.1278	-0.04845	0.17035	0.35035	-0.43	0.00015	0.233	0.15555	0.3496	-0.18215	-0.0183	-0.20245	-0.27685	0.0252	-0.08	-0.1754	-0.46515	0.19945	-0.12245	0.18245	-0.3186	-0.0351	-0.23125	-0.11285		1.31084	0.786161	0.0298918	0.351248	1.24954	4.12155	5.62919e-07	0.704665	0.785678	2.59071	0.61364	0.00365118	0.760161	2.2354	0.0140125	0.163098	0.368989	8.25498	0.91315	0.484564
Q34	5	126	16.3101	-0.1542	-0.0377	0.1328	0.2713	0.3061	0.1671	0.341	0.0961	0.2128	-0.1223	0.1992	0.31905	-0.0965	-0.05935	0.05175	0.10855	0.86345	0.2778	0.04975	0.04095	-0.0957	-0.10235	-0.00795	0.0624	-0.00925		0.911683	0.068412	0.224575	0.890899	0.953836	0.62241	2.90919	0.119872	1.47044	0.317051	0.733895	1.10981	0.172713	0.102732	0.0590927	0.300282	8.94187	2.94438	0.0568146	0.0541927
Q45	8	91	15.9893	0.1143	0.0841	0.30005	0.66455	0.07515	0.108	0.0674	0.39845	0.14655	-0.3068	-0.2139	0.2753	0.28345	0.21975	0.20485	-0.1392	0.0576	0.21255	-0.00995	0.22475	-0.0366	0.2359	-0.3855	0.1323	-0.17995		0.500919	0.340441	1.14644	5.34545	0.0574917	0.259999	0.113654	2.06072	0.69739	1.9952	0.846207	0.82631	1.49013	1.40839	0.925945	0.493797	0.0397923	1.72366	0.00227258	1.63242
Q33	5	77	15.5703	-0.2763	-0.09835	0.3593	0.345	0.10145	-0.1649	0.65755	0.23175	0.16445	-0.07405	-0.2062	-0.2225	0.0493	0.1839	0.0669	0.02755	0.274	0.0472	0.05315	-0.11325	0.15925	-0.14075	0.3154	0.08585	0.14085		2.92709	0.465585	1.64391	1.44068	0.104773	0.606129	10.8174	0.697125	0.878157	0.116232	0.78638	0.539747	0.0450779	0.986345	0.0987565	0.0193425	0.900441	0.084999	0.0648456	0.414486
Q30	4	91	15.4438	0.04025	0.1477	-0.37555	0.29775	-0.1487	0.1863	-0.0233	0.2904	0.0101	-0.159	0.1772	-0.1846	0.4672	-0.2483	-0.16555	0.062	0.0847	0.13575	0.2973	0.05285	0.02515	-0.20725	-0.5769	-0.398	-0.2905		0.0621165	1.05005	1.79598	1.07308	0.225097	0.773658	0.0135824	1.09462	0.00331243	0.535883	0.580741	0.37153	4.04833	1.79812	0.604744	0.097961	0.0860441	0.703088	2.02891	0.0902658
Q44	8	71	15.281	0.0265	-0.10835	0.1234	0.198	-0.33375	0.63185	0.18465	0.3282	-0.30435	-0.2712	-0.1184	0.1094	0.1458	0.03875	0.025	-0.03535	0.18015	-0.06425	-0.13405	0.1436	-0.0981	0.0114	-0.39145	0.23505	-0.324		0.0269257	0.565077	0.193908	0.474525	1.13394	8.89921	0.853026	1.39813	3.00781	1.55903	0.259274	0.130486	0.394262	0.0437934	0.0137909	0.0318455	0.389245	0.157498	0.412484	0.666411
Q35	6	27	15.2009	0.1518	0.26175	-0.449	-0.11415	-0.0522	0.2404	0.0063	0.04215	0.07915	-0.3482	0.34115	0.05545	0.1546	0.04515	-0.2251	-0.25655	0.0507	-0.18915	0.1246	-0.31355	0.00215	0.0972	0.5865	-0.1219	-0.23555		0.883524	3.29779	2.56719	0.157718	0.0277388	1.28823	0.000992989	0.0230604	0.203426	2.57	2.15251	0.0335223	0.443291	0.059454	1.11806	1.67731	0.0308298	1.36503	0.356377	3.17722
Q27	4	53	15.0332	-0.2464	0.073	-0.32595	0.8388	-0.21035	-0.27775	0.04105	0.00295	0.12175	0.00715	0.282	-0.02845	0.3109	-0.03225	-0.15815	0.00585	-0.0128	0.13045	-0.0578	-0.29315	-0.0615	-0.1168	0.0543	-0.03975	-0.427		2.32786	0.256505	1.3529	8.5162	0.450435	1.71962	0.042159	0.000112957	0.481329	0.00108365	1.4708	0.0088246	1.79272	0.0303337	0.551889	0.000872131	0.00196505	0.649259	0.0766884	2.77724
Q20	2	152	14.7188	-0.1533	-0.3612	-0.25445	0.47385	0.16315	-0.0575	-0.24155	0.1339	0.3892	0.46515	0.2044	-0.219	0.0137	0.1059	-0.1205	0.13395	0.10945	-0.03325	-0.0979	0.06955	0.20005	0.107	-0.09235	0.01435	-0.0081		0.901071	6.27979	0.82446	2.71776	0.27097	0.0736986	1.45975	0.232719	4.9187	4.58629	0.77271	0.5229	0.00348106	0.327082	0.320396	0.457252	0.143676	0.0421806	0.220008	0.156325
Q21	3	26	14.6526	0.0109	-0.26945	-0.0444	-0.12655	-0.1994	-0.0973	-0.07395	-0.09795	-0.1789	0.10025	-0.60645	-0.0531	-0.30945	-0.18415	-0.17765	0.2017	-0.41975	-0.04385	-0.15235	-0.29965	-5e-05	-0.24135	-0.2244	-0.4127	-0.1084		0.00455541	3.49467	0.0251033	0.193844	0.40476	0.211032	0.136817	0.124532	1.03926	0.213032	6.80213	0.0307411	1.77603	0.989028	0.696376	1.03677	2.11318	0.0733617	0.532793	2.90176
Q31	4	119	14.6421	0.18405	-0.0059	-0.05605	0.4124	-0.0254	-0.0788	-0.039	0.23895	0.67915	0.1008	-0.0196	0.0978	0.1651	0.2632	-0.05255	-0.15885	0.16875	-0.04505	0.15675	-0.1978	0.02465	-0.169	-0.0547	-0.3182	0.092		1.29881	0.00167554	0.0400052	2.05857	0.00656772	0.138413	0.0380533	0.741114	14.9774	0.215376	0.00710505	0.104282	0.50555	2.0204	0.0609339	0.643049	0.34154	0.0774318	0.564013	1.2644
Q7	1	100	14.5713	-0.0338	-0.36345	-0.29945	-0.0285	0.0941	0.1957	0.04245	0.02775	-0.3576	0.0958	-0.2653	-0.1273	-0.37845	0.12485	-0.0515	-0.13885	-0.12995	0.19075	-0.0954	-0.02505	-0.0748	0.32445	-0.2298	0.63825	-0.0932		0.0438034	6.35827	1.14186	0.00983148	0.0901418	0.8537	0.0450836	0.00999533	4.1524	0.194539	1.30176	0.17668	2.65636	0.454614	0.0585232	0.491317	0.202538	1.38822	0.208915	0.0202791
Q46	9	44	14.4407	-0.2763	-0.0977	0.0246	-0.2389	0.1751	0.33425	0.1333	0.0151	-0.121	-0.0999	-0.0828	0.1242	-0.02985	0.1114	-0.0437	-0.1218	0.30505	0.03525	0.00145	-0.2699	-0.243	0.17705	-0.0701	-0.0491	0.80015		2.92709	0.459451	0.00770611	0.690814	0.312118	2.49038	0.444553	0.00295954	0.475417	0.211547	0.126799	0.16818	0.0165257	0.361939	0.0421382	0.378063	1.11608	0.0474076	4.82625e-05	2.35418
Q26	3	137	14.134	-0.13725	0.3221	-0.0201	0.04515	0.9707	0.0091	0.25405	0.25085	-0.1431	0.1528	0.14245	-0.13175	0.1644	0.0109	0.15375	0.2473	0.17675	-0.07485	0.11665	-0.096	0.0956	0.105	0.2098	0.14055	-0.04605		0.72227	4.9938	0.00514466	0.0246743	9.59217	0.00184589	1.61474	0.816769	0.664942	0.494906	0.375301	0.189248	0.501272	0.00346512	0.521607	1.55854	0.374691	0.213754	0.312351	0.297835
Q18	2	107	13.4565	-0.0274	-0.18115	0.00765	0.1441	-0.1173	0.2487	0.0748	-0.08535	0.03135	-0.39185	0.24425	0.24375	0.63915	0.0349	0.22105	0.2299	-0.0818	0.04	0.1898	0.3594	-0.1076	-0.09255	-0.0012	-0.0286	0.24915		0.0287856	1.57953	0.000745225	0.251337	0.140069	1.37872	0.13998	0.0945536	0.0319139	3.25473	1.10338	0.647768	7.57662	0.0355235	1.07819	1.34694	0.0802529	0.061045	0.826925	4.17436
Q36	6	62	13.2537	0.2912	0.25955	-0.17805	0.0257	0.05165	0.3014	0.0871	0.23585	0.2115	-0.28295	0.00335	-0.2112	-0.3099	0.1266	0.2307	0.07195	0.26945	0.23815	0.1825	-0.1219	-0.06425	0.30695	-0.23525	0.14945	-0.23465		3.2513	3.24259	0.403691	0.00799457	0.0271574	2.02493	0.189802	0.722009	1.45253	1.69705	0.00020756	0.486316	1.7812	0.467447	1.17438	0.131926	0.870784	2.16387	0.764539	0.48022
Q51	10	63	12.8809	0.0758	-0.25205	0.18535	-0.0777	0.1533	-0.1745	-0.31535	-0.0505	-0.00045	-0.33125	0.29345	0.3663	-0.22825	0.21885	-0.0857	0.21005	0.20705	-0.0957	-0.0002	0.21325	-0.3976	0.11665	-0.0454	0.01275	-0.0334		0.220299	3.0579	0.437472	0.0730754	0.239239	0.678757	2.48799	0.033102	6.57551e-06	2.32588	1.59266	1.46287	0.966254	1.39688	0.16206	1.12439	0.514167	0.349425	9.18193e-07	1.46964
Q6	1	89	12.7642	0.0684	-0.25635	-0.1419	0.1331	0.18035	0.2313	0.0441	0.14575	-0.2317	0.58625	-0.0186	0.1997	-0.2151	0.14535	0.1112	0.01975	-0.24905	0.19665	0.01225	-0.07735	-0.0934	0.2373	-0.2323	-5e-05	0.1644		0.179385	3.16313	0.256407	0.21443	0.331115	1.19255	0.0486565	0.275733	1.74324	7.2852	0.00639854	0.434797	0.858125	0.616163	0.272849	0.00994041	0.743922	1.47543	0.00344466	0.193354
Q11	2	18	12.6865	-0.3531	-0.12205	0.0807	-0.2374	0.0699	0.09455	-0.2563	0.0616	0.1782	-0.1772	-0.23625	0.01035	-0.38065	-0.39895	0.1811	-0.153	0.08345	-0.00575	-0.1942	0.00025	-0.33055	0.11855	-0.0557	-0.1272	0.1185		4.78047	0.71701	0.08293	0.682167	0.0497395	0.199272	1.64347	0.049253	1.03114	0.665585	1.03228	0.00116792	2.68733	4.64197	0.723686	0.596558	0.0835231	0.00126144	0.86571	2.01982e-06
Q52	10	92	12.3159	-0.12745	-0.2514	0.0915	-0.1793	0.0989	-0.1068	-0.1308	-0.27835	-0.1733	-0.30715	-0.0153	0.2559	0.31385	-0.0422	-0.2974	-0.19315	-0.3914	-0.22415	0.0002	0.0947	-0.3508	0.0118	-0.286	0.1804	0.03385		0.622809	3.04215	0.106612	0.389125	0.0995725	0.254253	0.428035	1.00567	0.975217	1.99976	0.0043295	0.713955	1.8269	0.0519386	1.95162	0.950735	1.83737	1.91694	9.18193e-07	0.289823
[truncated: 5 more columns]
